# Supplementary material for: The phosphoproteomic responses of duck (Cairna moschata) to classical/novel duck reovirus infections in the spleen tissue
Source: PubMed Central journal article supplement (PMC7499213; doi:10.1038/s41598-020-72311-0), 2020-09-17
Supplement: 41598_2020_72311_MOESM2_ESM.pdf [file 41598_2020_72311_MOESM2_ESM.pdf]

**The phosphoproteomic responses of duck (*Cairna moschata*) to classical/novel duck reovirus infections in the spleen tissue**

Tao Yun, Jionggang Hua, Weicheng Ye, Zheng Ni, Liu Chen, Cun Zhang \*

Institute of Animal Husbandry and Veterinary Sciences, Zhejiang Academy of Agricultural Sciences, Hangzhou 310021, China

\* Corresponding author:

Cun Zhang

Email Address: zhangcun@aliyun.com

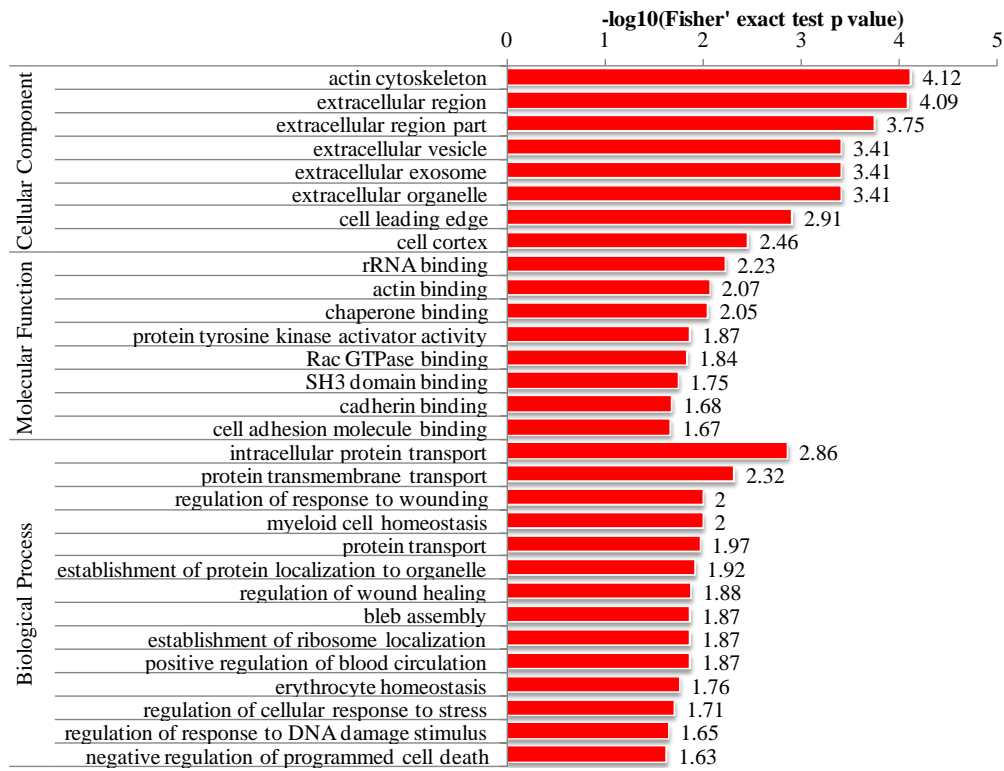

Figure S1 **KEGG enrichment analysis of the DPPs in the CDRV/Control comparison.**

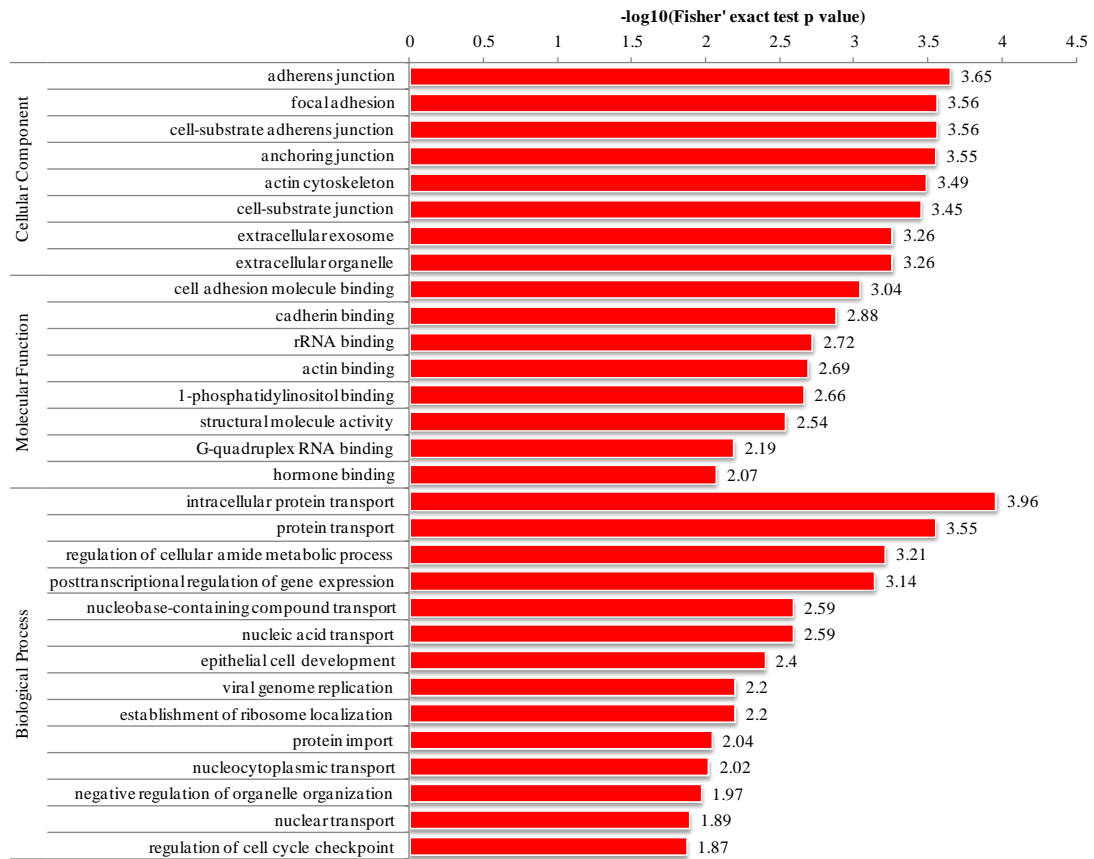

**Figure S2 KEGG enrichment analysis of the DPPs in the NDRV/Control comparison.**

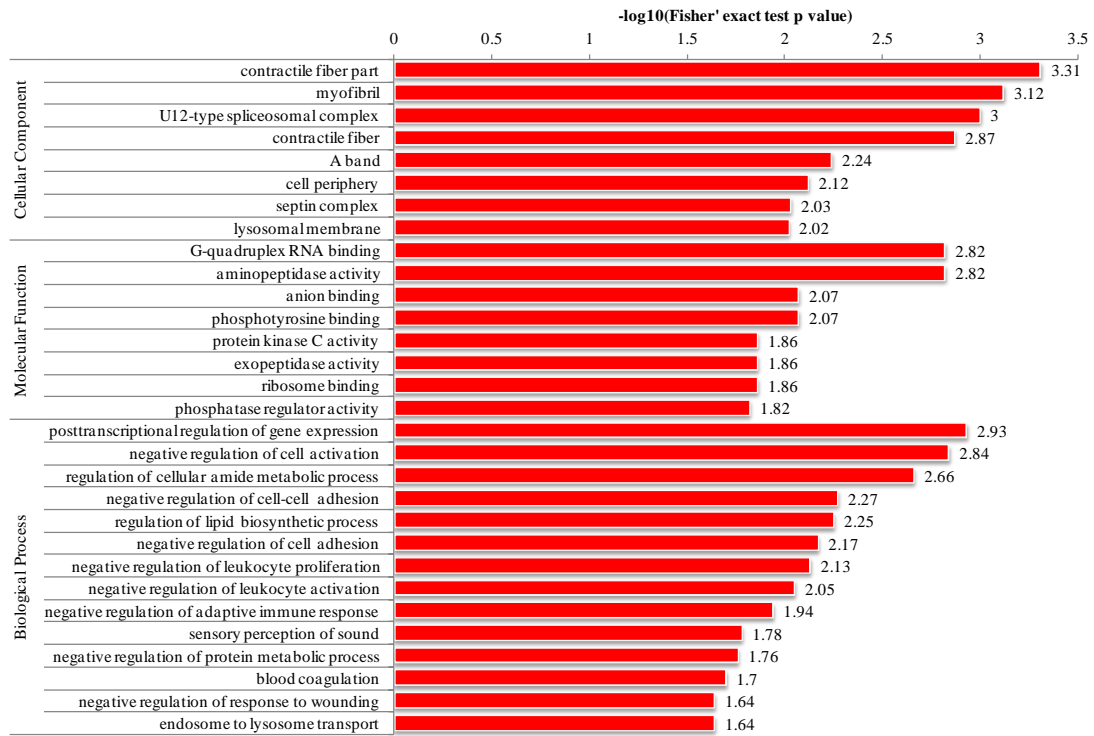

**Figure S3 KEGG enrichment analysis of the DPPs in the NDRV/CDRV comparison.**
